# Supplementary material for: The Viral Susceptibility of the Haloferax Species
Source: MDPI journal article supplement (doi:10.3390/v14061344), 2022-06-20
Supplement: s1 [file s1]

---

## Supplementary material

# Viral susceptibility of *Haloferax* species

Zaloe Aguirre Sourrouille <sup>1\*</sup>, Sabine Schwarzer <sup>1,2\*</sup>, Sebastian Lequime <sup>3</sup>, Hanna M. Oksanen <sup>4#</sup> and Tessa E.F. Quax <sup>1,2#</sup>

<sup>1</sup> Biology of Archaea and Viruses, Groningen Biomolecular Sciences and Biotechnology Institute, University of Groningen, 9747 AG Groningen, The Netherlands.

<sup>2</sup> Archaeal Virus-Host Interactions, Faculty of Biology, University of Freiburg, Freiburg, Germany

<sup>3</sup> Cluster of Microbial Ecology, Groningen Institute for Evolutionary Life Sciences, University of Groningen, Groningen, the Netherlands

<sup>4</sup> Molecular and Integrative Biosciences Research Programme, Faculty of Biological and Environmental Sciences, University of Helsinki, Helsinki, Finland.

**Supplementary Table S1. *Haloferax* strains used in the study**

**Supplementary Table S2. Viruses used in the study**

**Supplementary Table S3. Underrepresented palindromic motifs in viral genomes**

**Supplementary Table S4. Manual counting of modified DNA motifs found in the genomes of viruses infecting *Hfx. gibbonsii* LR2-5**

**Supplementary Figure S1. Multiple sequence alignment of adhesins belonging to the Group 3**

**Supplementary Figure S2. VIRIDIC generated heatmap**

**Supplementary References**

**Table S1. *Haloferax* strains used in the study**

| Strain                                 | Reference |
|----------------------------------------|-----------|
| <i>Haloferax volcanii</i> H26          | [37]      |
| <i>Haloferax</i> sp. s5a-1             | [29]      |
| <i>Haloferax</i> sp. SP10-1            | [29]      |
| <i>Haloferax</i> sp. SS9-6             | [19]      |
| <i>Haloferax</i> sp. SS10-6            | [19]      |
| <i>Haloferax</i> sp. SS10-7            | [19]      |
| <i>Haloferax</i> sp. LR1-5             | [59]      |
| <i>Haloferax</i> sp. LR1-14            | [59]      |
| <i>Haloferax</i> sp. LR1-18            | [59]      |
| <i>Haloferax</i> sp. LR1-19            | [59]      |
| <i>Haloferax</i> sp. LR1-24            | [59]      |
| <i>Haloferax gibbonsii</i> LR2-5       | [59,60]   |
| <i>Haloferax</i> sp. LR2-16            | [59]      |
| <i>Haloferax mediterranei</i> DSM 1411 | [76]      |

---

**Table S2. Viruses used in the study**

Please see separate excel table

**Table S3. Underrepresented palindromic motifs in viral genomes<sup>1</sup>**

|         | CTAG   | GATC   | AGCT   | TGCA   | CATG   |
|---------|--------|--------|--------|--------|--------|
| HFTV1   | 0.0314 | 0.0714 | 0.2252 | 0.8473 | 0.9074 |
| HCTV-6  | 0      | 0      | 0      | 0.2976 | 0.4192 |
| HCTV-15 | 0      | 0      | 0      | 0.2976 | 0.4192 |
| HRTV-11 | 0      | 0      | 0      | 0.2742 | 0.3604 |
| HSTV-2  | 0      | 0      | 0      | 0.3023 | 0.3638 |
| HRTV-7  | 0      | 0      | 0      | 0.3291 | 0.3654 |
| HRTV-2  | 0      | 0      | 0      | 0.3091 | 0.3721 |
| HRTV-10 | 0      | 0      | n      | 0.2756 | 0.3855 |
| HRTV-20 | 0      | 0      | n      | 0.2959 | 0.3261 |
| HRTV-18 | 0      | 0      | n      | 0.2964 | 0.3263 |
| HRTV-26 | 0      | 0      | n      | 0.2764 | 0.3341 |
| HRTV-22 | 0.0067 | 0      | n      | 0.2707 | 0.3146 |
| HJTV-1  | 0      | 0      | n      | 0.24   | 0.3905 |
| HRTV-21 | 0      | 0      | n      | 0.2565 | 0.3741 |
| HRTV-5  | 0      | 0      | n      | 0.2757 | 0.3566 |
| HRTV-13 | 0      | 0      | n      | 0.2604 | 0.3638 |
| HRTV-16 | 0      | 0      | n      | 0.2811 | 0.3554 |
| HRTV-9  | 0      | 0      | n      | 0.3411 | 0.3623 |
| HCTV-10 | 0      | 0      | n      | 0.2886 | 0.3382 |
| HCTV-8  | 0      | 0      | n      | 0.2886 | 0.3379 |
| HCTV-7  | 0      | 0      | n      | 0.2993 | 0.3408 |
| HCTV-11 | 0      | 0      | n      | 0.2994 | 0.3412 |
| HCTV-9  | 0      | 0      | n      | 0.2991 | 0.3409 |

<sup>1</sup> Calculated as Odds Markov values where they are not zero. n represent normal frequencies.  
Orange color indicates the value 0.

**Table S4 Manual counting of modified DNA motifs found the genomes of viruses infecting *Hfx. gibbonsii* LR2-5**

|         | CTAG <sup>1</sup> | GCGCTG | AYCnnnnnnCTTYG | CRAAGnnnnnnGRT | CCAnnnnnnnRTcC | GnGAYnnnnnnTGG |
|---------|-------------------|--------|----------------|----------------|----------------|----------------|
| HFTV-1  | 2                 | 0      | 2              | 0              | 3              | 9              |
| HCTV-6  | 0                 | 41     | 9              | 14             | 6              | 10             |
| HCTV-15 | 0                 | 41     | 9              | 14             | 6              | 10             |
| HRTV-11 | 0                 | 39     | 6              | 15             | 9              | 7              |
| HSTV-2  | 0                 | 37     | 8              | 14             | 8              | 6              |
| HRTV-7  | 0                 | 32     | 6              | 15             | 9              | 5              |
| HRTV-2  | 0                 | 36     | 8              | 15             | 8              | 9              |
| HRTV-10 | 0                 | 12     | 8              | 10             | 5              | 6              |
| HRTV-20 | 0                 | 14     | 11             | 11             | 7              | 6              |
| HRTV-18 | 0                 | 14     | 11             | 11             | 7              | 6              |
| HRTV-26 | 0                 | 16     | 12             | 9              | 7              | 4              |
| HRTV-22 | 1                 | 13     | 13             | 9              | 6              | 5              |
| HJTV-1  | 0                 | 9      | 9              | 10             | 4              | 9              |
| HRTV-21 | 0                 | 13     | 9              | 10             | 3              | 7              |
| HRTV-5  | 0                 | 10     | 5              | 11             | 5              | 7              |
| HRTV-13 | 0                 | 10     | 6              | 11             | 5              | 8              |
| HRTV-16 | 0                 | 10     | 6              | 10             | 2              | 7              |
| HRTV-9  | 0                 | 14     | 5              | 12             | 3              | 9              |
| HCTV-10 | 0                 | 10     | 5              | 10             | 5              | 7              |
| HCTV-8  | 0                 | 10     | 5              | 10             | 5              | 7              |
| HCTV-7  | 0                 | 10     | 6              | 10             | 5              | 7              |
| HCTV-11 | 0                 | 10     | 6              | 10             | 5              | 7              |
| HCTV-9  | 0                 | 10     | 6              | 10             | 5              | 7              |

<sup>1</sup>Modified bases are shown in bold. The color range blue to yellow is from a low number of occurrences (0) to a high number of occurrences (>30)

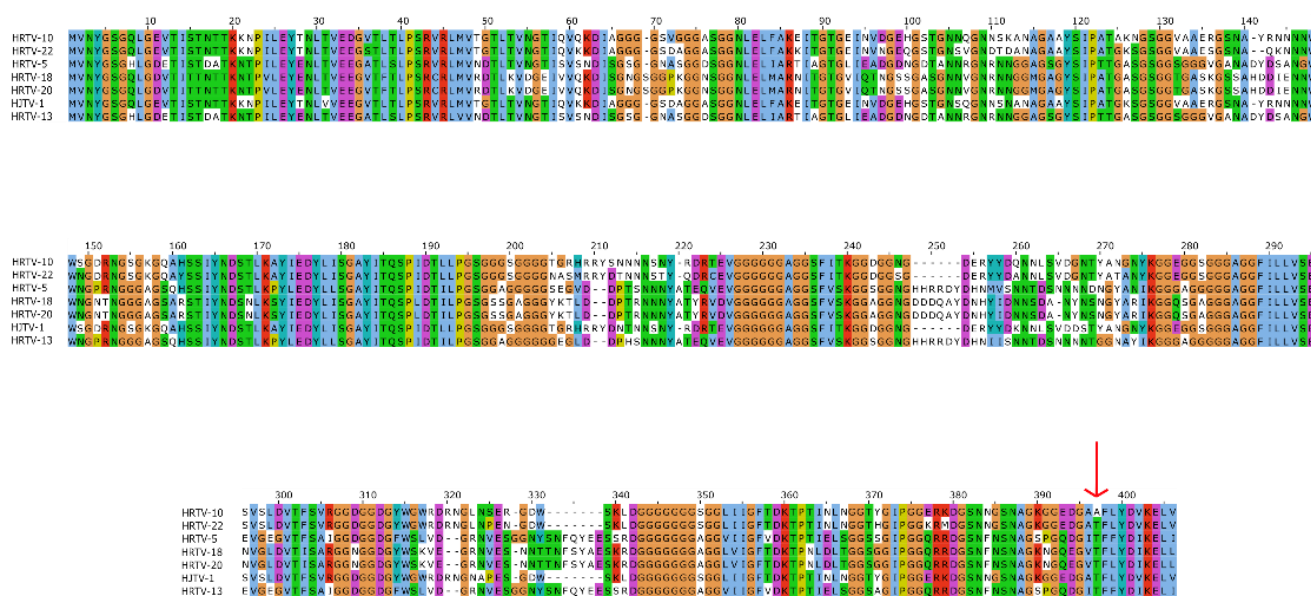

**Figure S1.** Multiple sequence alignment of adhesins belonging to the Clade 3 (see also Figure 5). Protein sequences were aligned using Clustal W. The colors correspond to the amino acid identity. The arrow indicates the T380A substitution in HRTV-10.
